# Supplementary material for: Main-chain flexibility and hydrophobicity of ionenes strongly impact their antimicrobial activity: an extended study on drug resistance strains and Mycobacterium
Source: Royal Society of Chemistry journal article supplement (doi:10.1039/d2ra04121a), 2022-01-01

## A main-chain flexibility and hydrophobicity of ionenes strongly impact their antimicrobial activity, extended study on drug resistance strains and *Mycobacterium*.

<sup>1</sup>Rafał J. Kopiasz, <sup>2</sup>Anna Zabost, <sup>1</sup>Magdalena Myszka, <sup>3</sup>Aleksandra Kuźmińska, <sup>1</sup>Karolina Drężek, <sup>1</sup>Jolanta Mierzejewska, <sup>1</sup>Waldemar Tomaszewski, <sup>2</sup>Agnieszka Iwańska, <sup>2</sup>Ewa Augustynowicz-Kopec, <sup>3</sup>Tomasz Ciach, <sup>1</sup>Dominik Jańczewski

<sup>1</sup> Faculty of Chemistry, Warsaw University of Technology, Noakowskiego 3, 00-664 Warsaw, Poland

<sup>2</sup> Department of Microbiology, National Tuberculosis and Lung Diseases Research Institute, Płocka 26, 01-138 Warsaw, Poland

<sup>3</sup> Faculty of Chemical and Process Engineering, Warsaw University of Technology, Waryńskiego 1, 00-645 Warsaw, Poland

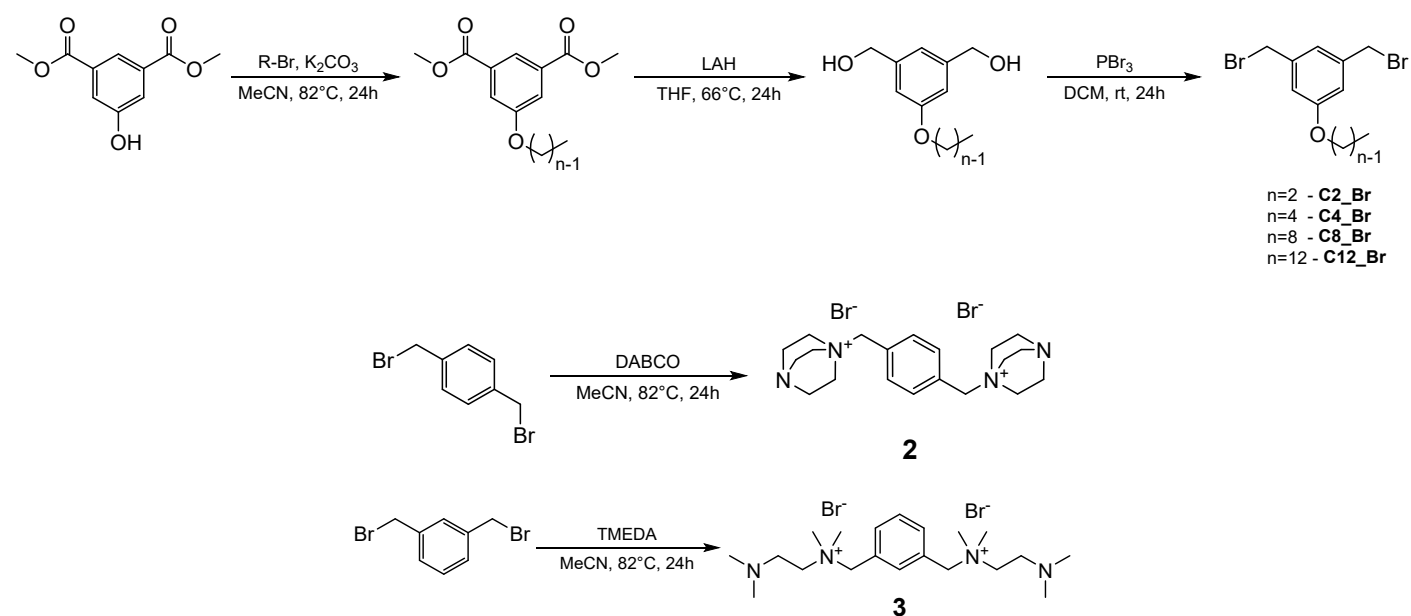

**Scheme S1.** The synthesis of used monomers in the ionenes synthesis.



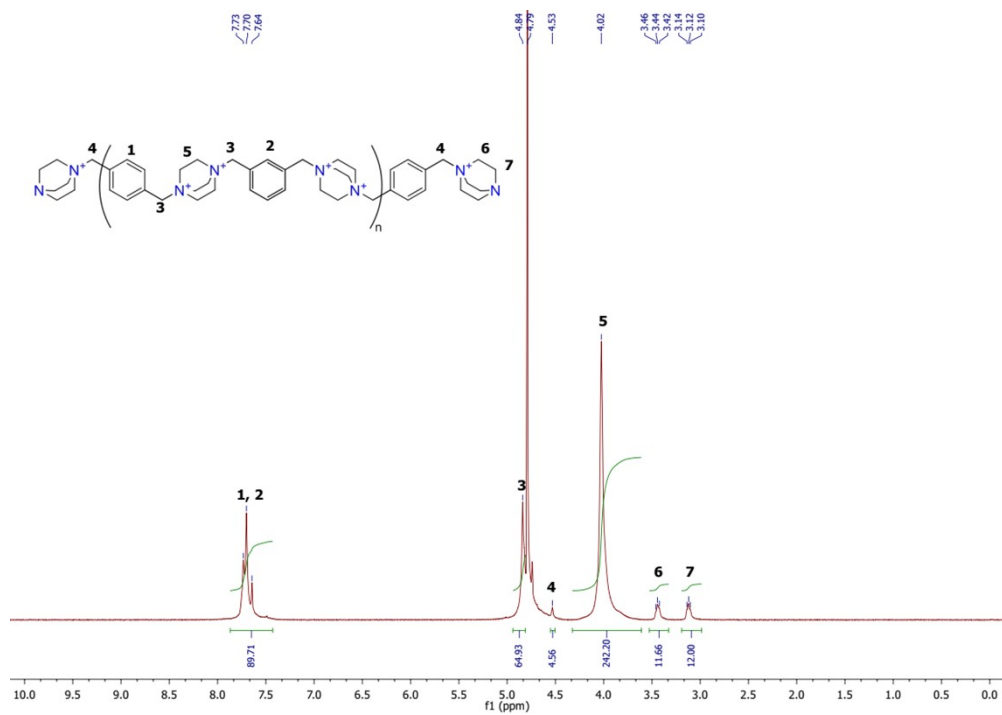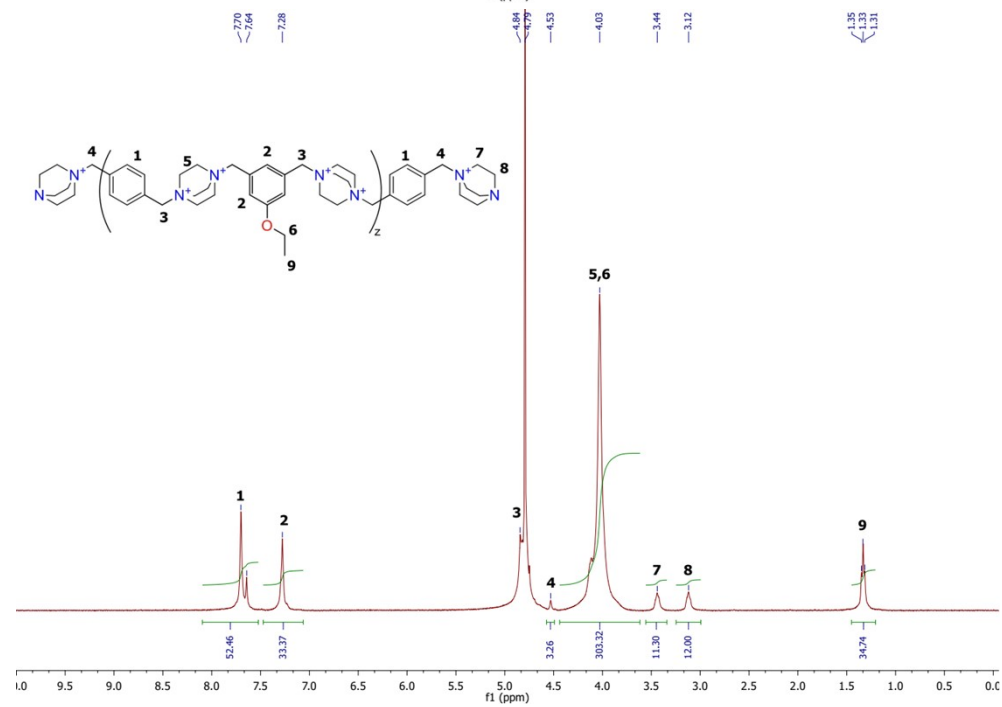

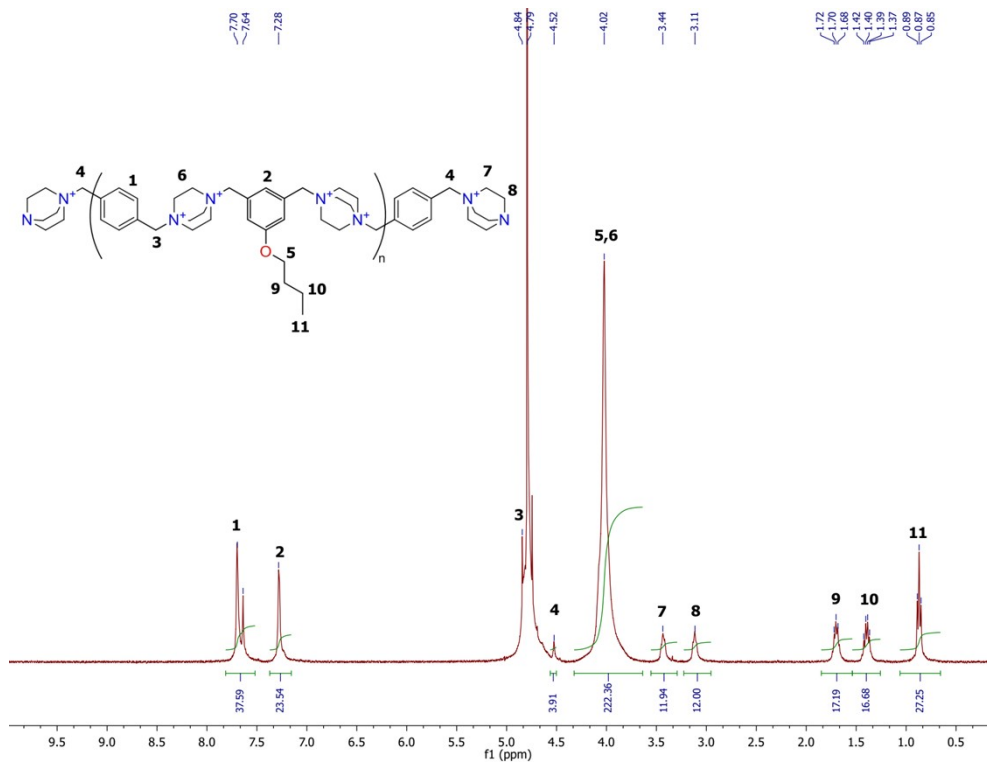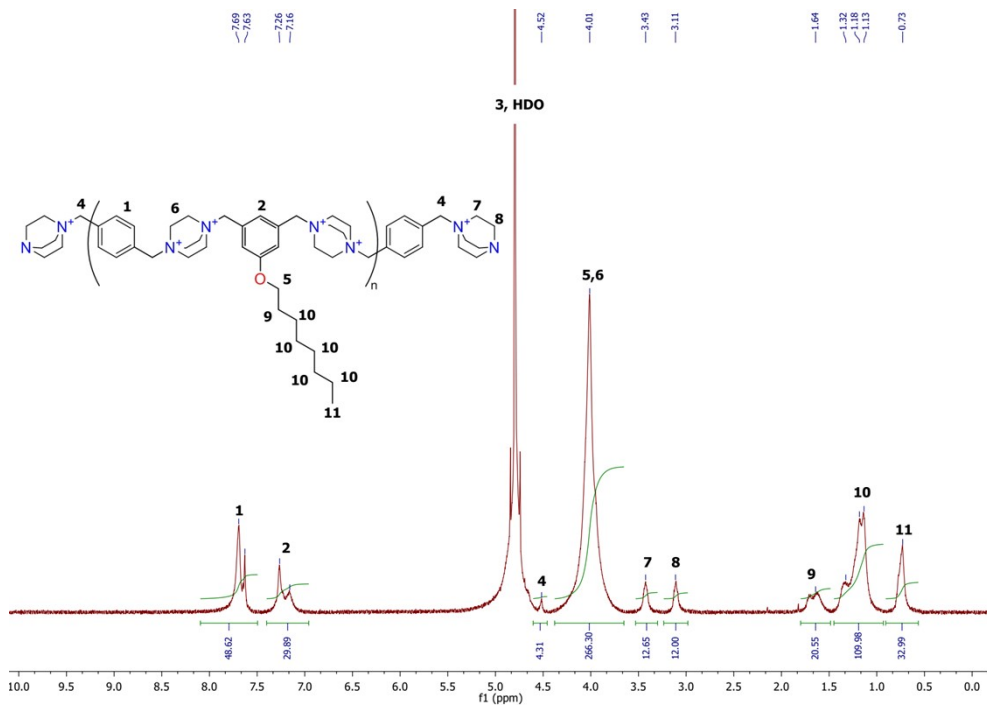

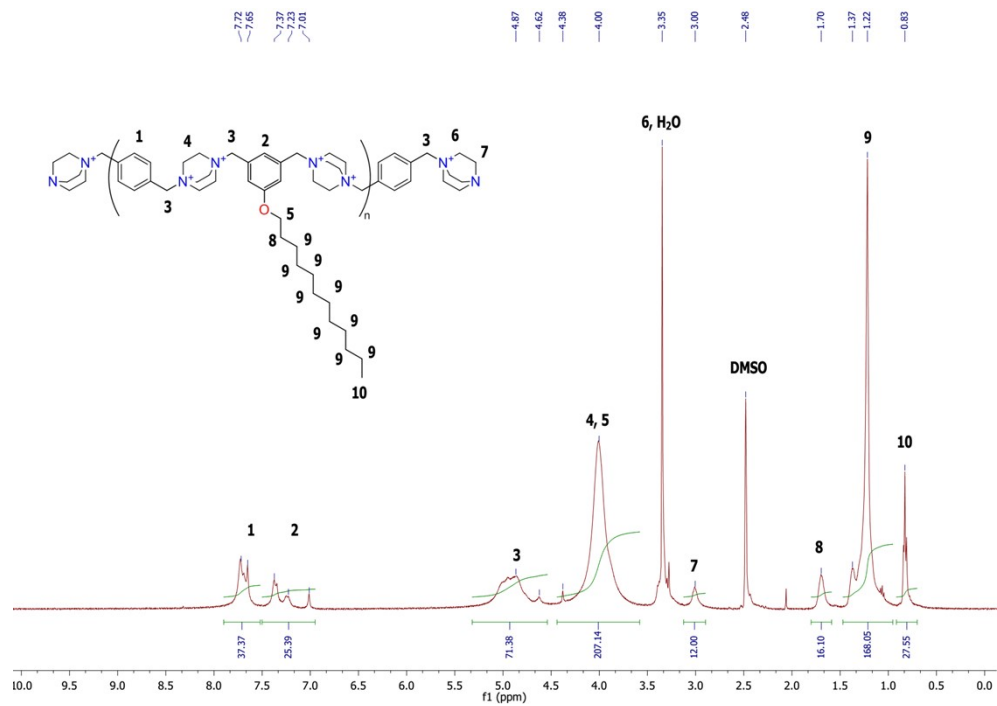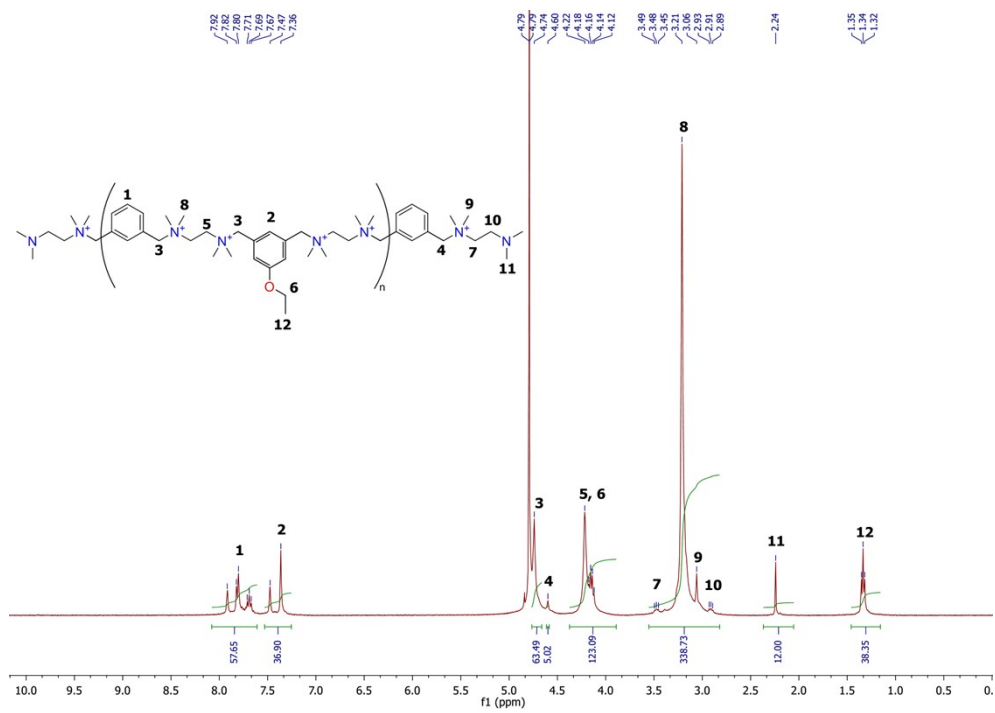

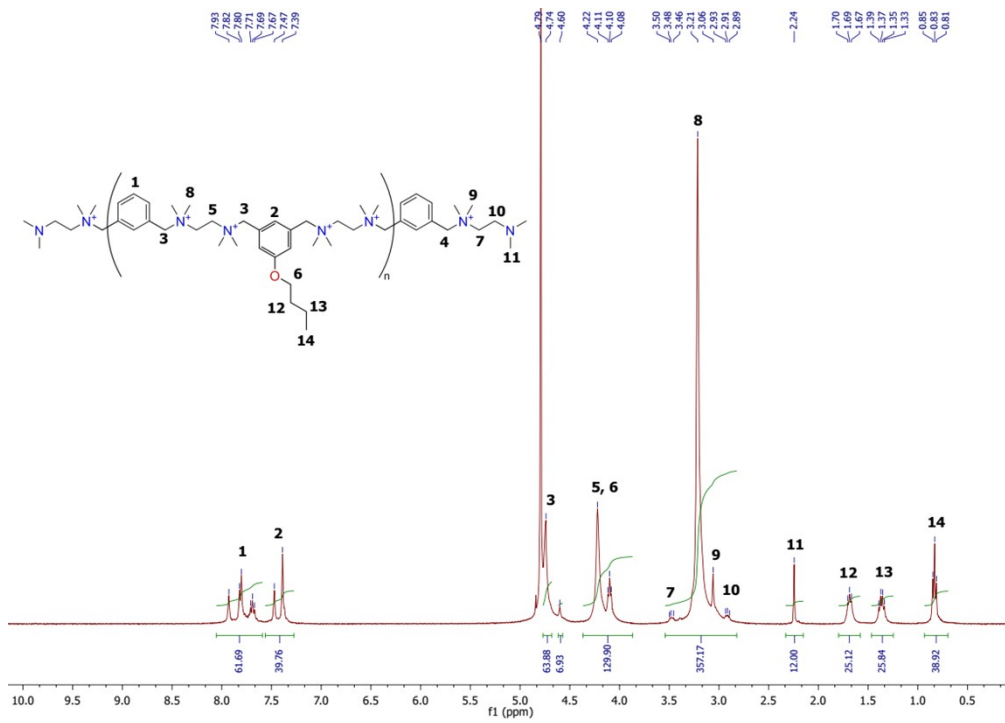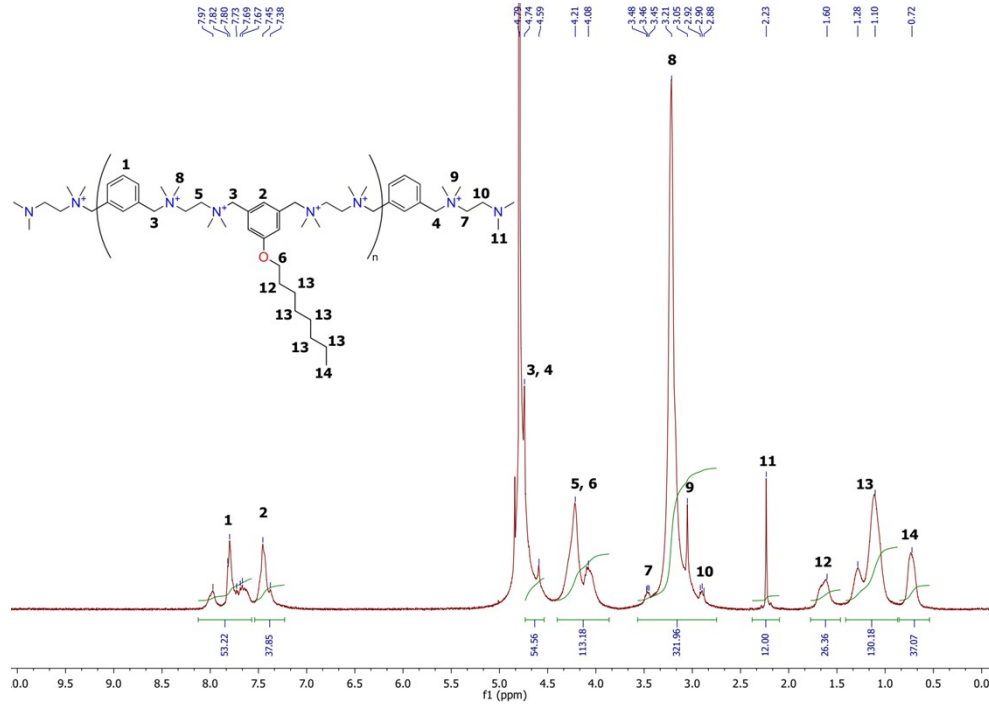

Supplement: d2ra04121a1.pdf [file d2ra04121a1.pdf]
